# Supplementary material
Source: PubMed Central journal article supplement (PMC2889320)
Supplement: 0914470107_pnas.200914470SI.pdf [file 0914470107_pnas.200914470SI.pdf]

# Supporting Information

Baker et al. 10.1073/pnas.0914470107

## SI Materials and Methods

**Phylogenetic Analyses.** Phylogenetic trees were constructed using the ARB software package and a Kimura/Dayhoff correction (1). *Giardia lamblia* (ATCC 50803) was used as the outgroup in all trees. Bootstrapping analyses were done using TREE\_PUZZLE quarteting with defaults settings (2), and these values were superimposed on the FastDNAML (3) and Protein\_ML trees shown in Figs. S1 and S2. The same 26 strains were used to generate the RadA, EF-2, and EF-1a trees shown in Fig. S2.

**Fluorescent in Situ Hybridization.** New FISH probes were designed to target ARMAN (archaeal Richmond Mine acidophilic nanoorganisms)-4 and -5 using methods described previously (4). The signal from these two probes was slight. To strengthen the signal, we used four unique probes targeting different regions of the ribosome. These probe sequences are as follows; ARM331 5'-GTCTCAG-TACCCTTCTGGGG-3', ARM329 5'-CCGYAGTGCTAGGGT-CCTTC-3', ARM424 5'-GGCAAAGTTCCCTTCCGG-3', and ARM927 5'-ACCCGTTTTTGTGCTCCC-3'. Probes were optimized for hybridization at 20% formamide concentration with a 46 °C incubation and washing at 48 °C.

**Cryo-Electron Tomographic Imaging.** Samples were removed from liquid nitrogen and loaded into the electron microscope sample holder for data acquisition. Images were acquired on a JEOL-3100 transmission electron microscope equipped a FEG electron source operating at 300 kV, an Omega energy filter, a Gatan 795 2K×2K CCD camera, and cryo-transfer stage. The stage was cooled using liquid nitrogen to 80 K.

To have a statistically relevant survey of cell sizes and morphologies, over 600 images or 2D projections were recorded using magnifications of 36K×, 30K×, and 25K× at the CCD, giving a pixel size of 0.83 nm, 1.0 nm, or 1.2 nm at the specimen, respectively. Underfocus values ranged between  $8 \pm 0.5$  and  $14 \pm 0.5$   $\mu\text{m}$ , and energy filter widths were typically around  $22 \pm 2$  eV. The survey of the grids and the selection of suitable targets for tilt-series acquisition were done in low-dose diffraction mode through the acquisition of hundreds of images.

Tomographic tilt series were acquired under low dose conditions, typically over an angular range between +65° and -65°,  $\pm 5^\circ$  with increments of 1° or 2°. Between 70 and 124 images were recorded for each series. A total of 69 3D data sets were obtained: 11 tilt series were acquired manually with the program Digital Micrograph (Gatan, Inc.), and 58 tilt series were acquired semi-automatically with the program Serial-EM (<http://bio3d.colorado.edu/>) adapted to JEOL microscopes. All images were recorded using a magnification of 36K×, 30K×, or 25K× at the CCD giving a pixel size of 0.833 nm, 1.0 nm, or 1.2 nm at the specimen, respectively. Underfocus values ranged between  $9 \pm 0.5$   $\mu\text{m}$  and  $16 \pm 0.5$   $\mu\text{m}$ , depending on the goal of the dataset, and energy filter widths ranged between 22 and 28 eV, also depending on the dataset. For all datasets, the maximum dose used per complete tilt series was  $\approx 150$  e-/Å<sup>2</sup>, with typical values of  $\approx 100$  e-/Å<sup>2</sup>.

**Image Processing and Analyses.** All tomographic reconstructions were obtained with the program Imod (<http://bio3d.colorado.edu/>).

The program ImageJ (National Institutes of Health, <http://rsb.info.nih.gov/ij/>) was used for analysis of the 2D image projections. Volume rendering and image analysis of tomographic reconstructions was done using the program VisIt (<http://www.llnl.gov/visit>). All movies were done with the package ffmpeg ([www.ffmpeg.org](http://www.ffmpeg.org)).

**Sequence Assembly, Annotation, and Analyses.** Sequencing reads were assembled using Phred/Phrap software. Multiple assemblies were run with various parameters and the best assembly was chosen. Assemblies were manually curated to resolve errors using standard approaches (5). Initial binning of contigs used coverage, GC content, and blastp matches with GenBank and genomic datasets for acid mine drainage (AMD) biofilm organisms (National Center for Biotechnology Information). Comparison with AMD datasets indicated that, in addition to ARMAN-4 and -5, genomic fragments of Archaea, G-plasma ( $\sim 5\times$ ), A-plasma ( $\sim 5\times$ ), ARMAN-2 ( $\sim 2\times$ ), and *Ferroplasma* Type II ( $\sim 2\times$ ) were present in the filtrate dataset.

Genome fragments of ARMAN-4 and -5 are highly syntenous. Refinement of the binning made use of synteny between fragments in these assemblies. Finally, binning and assembly completeness were evaluated using tetranucleotide frequency sequence signatures, analyzed using emergent self-organizing maps, as previously described (5). Tetranucleotide-emergent self-organizing maps generated clearly defined clusters for each ARMAN group, providing strong confirmation that all fragments deriving from each ARMAN populations were included in the analysis (6).

It is known that multiple displacement amplification of genomic DNA results in the formation of chimeras (7). On average, about 5% of the filtrate library reads in this study were chimeric (typically chimeras involved sequences derived from genomic locations a few kilobases apart). The chimera incidence was estimated based on a direct comparison of *Thermoplasmatales* reads mapped onto fragments from nonamplified community libraries. All of the ARMAN contigs used in this study were manually checked for chimeras and all instances were removed from the consensus sequences of the genomes.

The annotations of ARMAN-2, and the ARMAN-4 and -5 genomes used the Microbial Genome Annotation pipeline at Oak Ridge National Laboratory. Three gene modeling programs were run on all contigs using default settings that permit overlapping genes. Generation, (ORNL, <http://compbio.ornl.gov/generation/>) Glimmer, and Critica (v1.05) were used to predict ORFs. tRNAScanSE was used to locate tRNAs (8). These annotations were then manually curated, which mainly involved checking for artifacts such as genes split into two frames because of rare frame-shift sequencing errors. Gaps were searched for missing ORFs, and missing ORFs were identified at the ends of contigs.

The BLASTP e-value threshold was set at  $10^{-5}$ . The Pfam and TIGRFAMs threshold was set at the trusted cutoff for each model. Enzyme Catalog references were obtained from PRIAM using a search cutoff of  $1e^{-20}$ . Clusters of orthologous groups were run using the default cutoff. Identification of tRNAs was done using tRNAscan-SE, run using the prokaryotic default settings.

1. Ludwig W, et al. (2004) ARB: A software environment for sequence data. *Nucleic Acids Res* 32:1363–1371.  
2. Schmidt HA, Strimmer K, Vingron M, von Haeseler A (2002) TREE-PUZZLE: Maximum likelihood phylogenetic analysis using quartets and parallel computing. *Bioinformatics* 18:502–504.  
3. Felsenstein J (1981) Evolutionary trees from DNA sequences: A maximum likelihood approach. *J Mol Evol* 17:368–376.

4. Baker BJ, et al. (2006) Lineages of acidophilic archaea revealed by community genomic analysis. *Science* 314:1933–1935.  
5. Lo I, et al. (2007) Strain-resolved community proteomics reveals recombining genomes of acidophilic bacteria. *Nature* 446:537–541.  
6. Dick GJ, et al. (2009) Community-wide analysis of microbial genome sequence signatures. *Genome Biol* 10:R85.

7. Lasken RS, Stockwell TB (2007) Mechanism of chimera formation during the multiple displacement amplification reaction. *BMC Biotechnol* 7:19.

8. Schattner P, Brooks AN, Lowe TM (2005) The tRNAscan-SE, snoscan and snoGPS web servers for the detection of tRNAs and snoRNAs. *Nucleic Acids Res* 33:W686–W689.

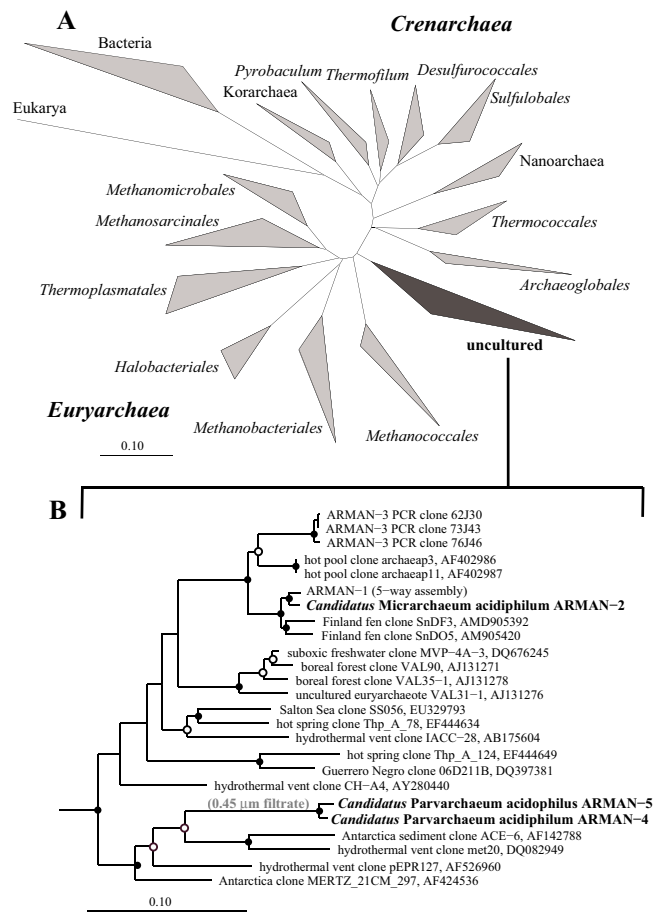

**Fig. S1.** Phylogenetic trees (maximum likelihood) of ARMAN group 16S rRNA genes. (A) The placement of ARMAN clade relative to cultured lineages. (B) A detailed tree of the ARMAN clade with the most closely related sequences (>800 bp in length) from other environments. Bootstrap values (TREE\_PUZZLE method) labeled at the nodes with circles: >75 are solid circles and >50 are unfilled circles. Scale bars indicate changes per site.

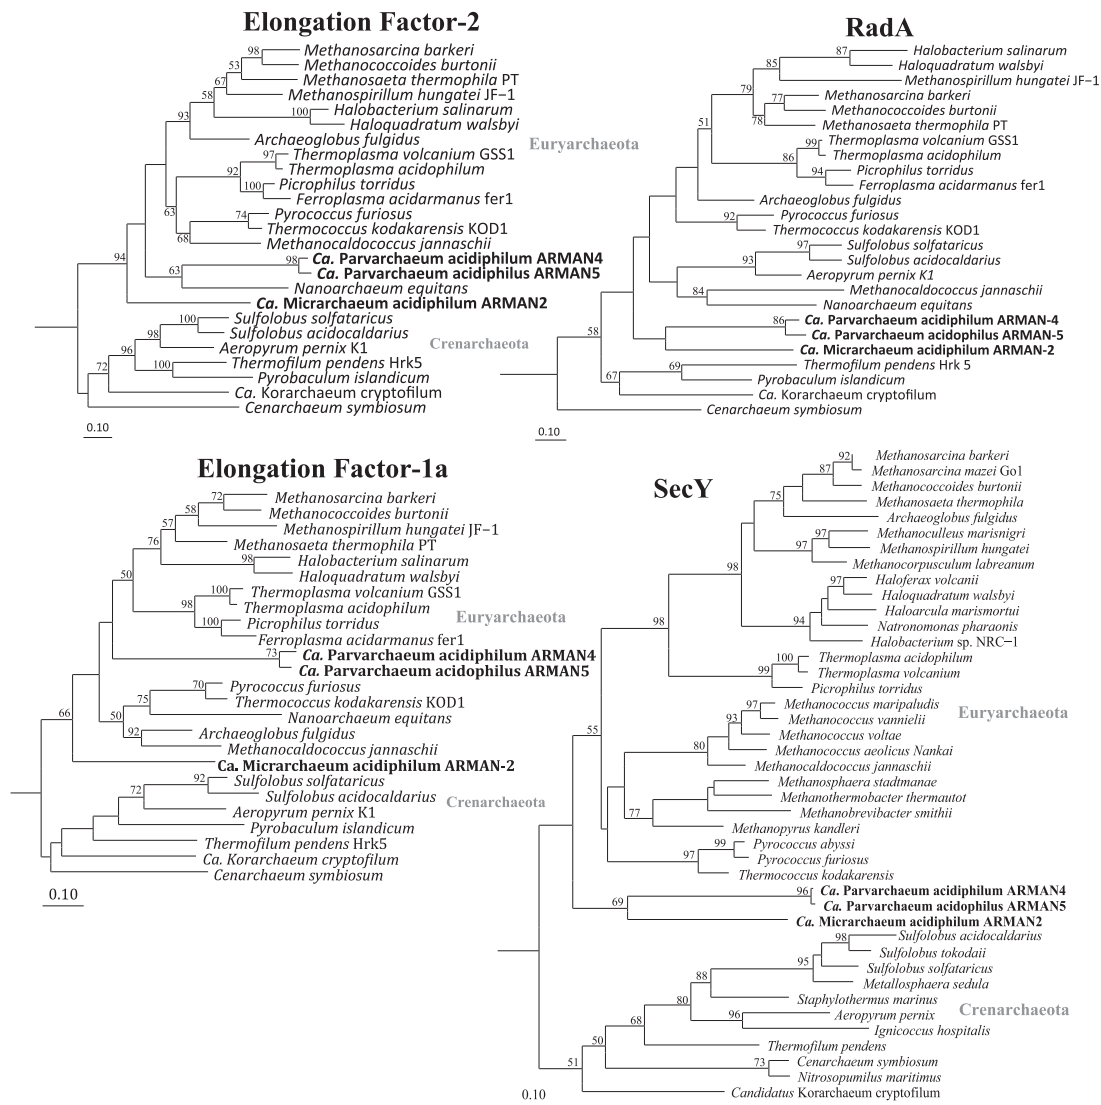

**Fig. S2.** Phylogenetic analyses (generated using maximum likelihood (Protein\_ML) in the ARB software package) of predicted proteins from the ARMAN genomes. Numbers at the nodes are bootstrap statistical supports for each of the branchings.

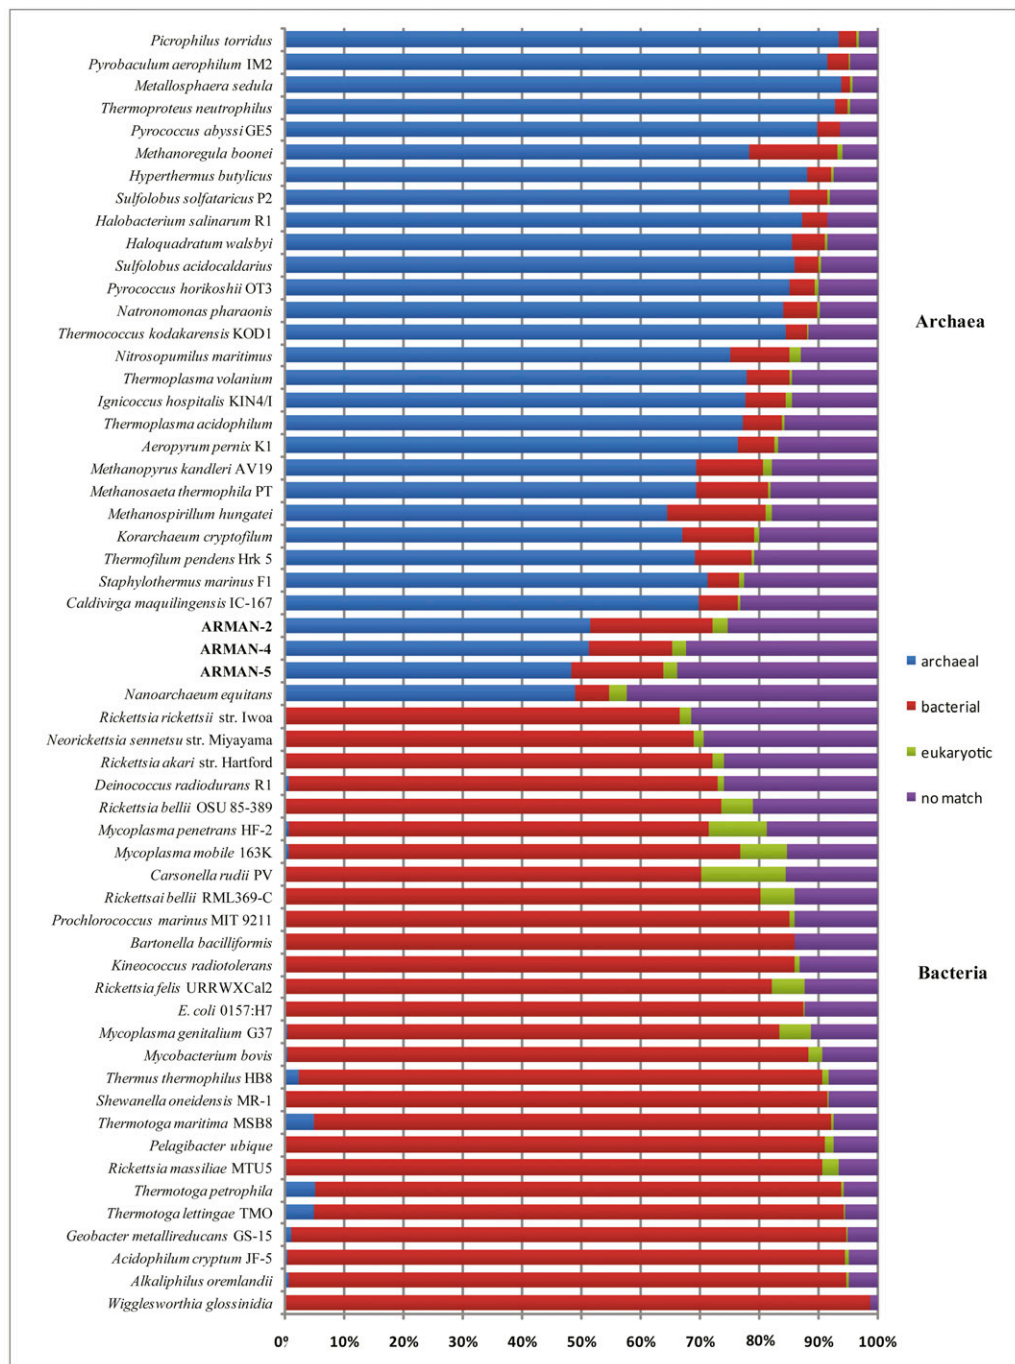

**Fig. S3.** Chart showing the percentage of top NCBI hits (blastp) to predicted proteins from each of the three domains for a set of sequenced bacterial and archaeal genomes. The percentage of “no hits” is high for ARMAN compared with other genomes.

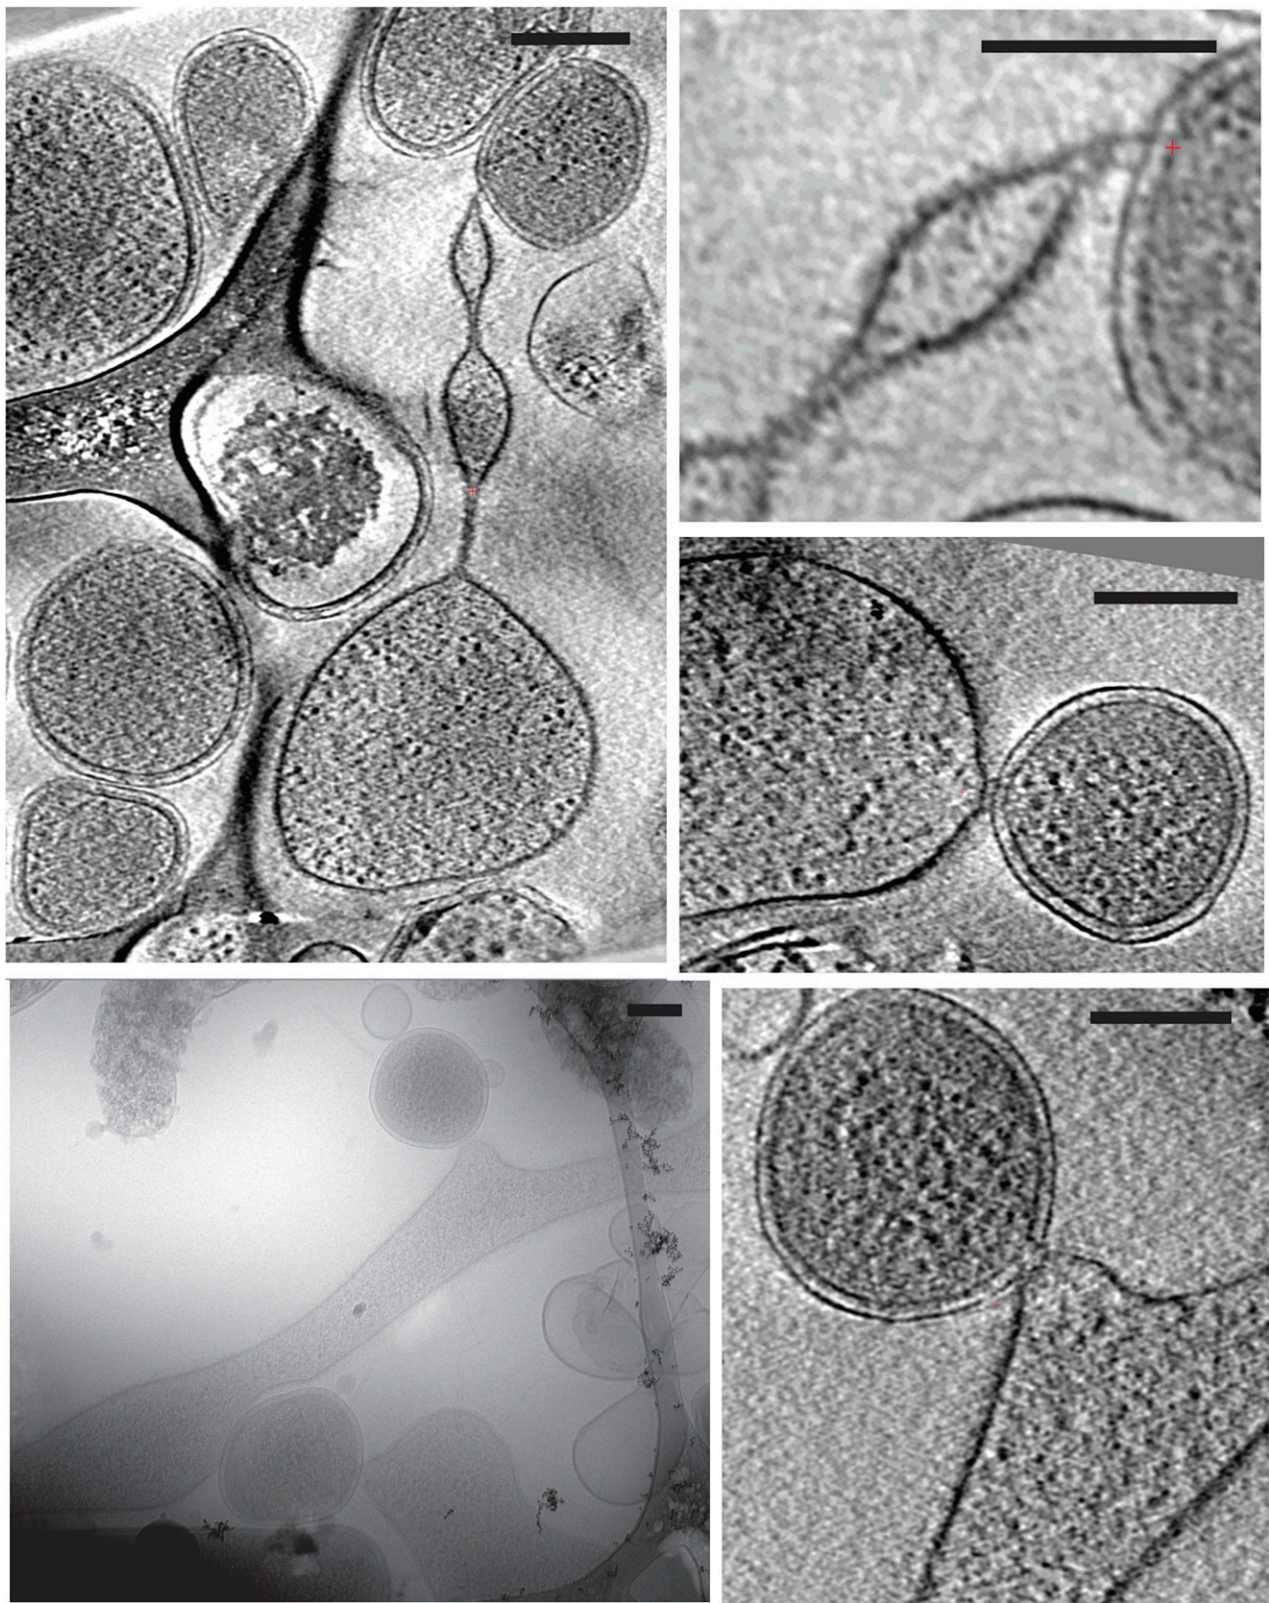

Fig. S4. One voxel-thick slices through tomographic reconstructions of ARMAN cells with associations with *Thermoplasma*-like cells. (Scale bars, 250 nm.)

**Table S1. List of clusters of orthologous groups matches for *Ca. M. acidiphilum* ARMAN-2, *Ca. P. acidiphilum* ARMAN-4, and *Ca. P. acidiphilum* ARMAN-5 genes that are represented in the bacterial domain, but have not been seen previously in other Archaea**

| Gene                      | COG     | Function                                                                          | Top BLASTP hit                                                                            | E-value   |
|---------------------------|---------|-----------------------------------------------------------------------------------|-------------------------------------------------------------------------------------------|-----------|
| <i>Ca. M. acidiphilum</i> |         |                                                                                   |                                                                                           |           |
| ARMAN-2                   |         |                                                                                   |                                                                                           |           |
| <i>UNLARM2_2</i>          | COG3545 | Esterase of the $\alpha/\beta$ hydrolase fold                                     | Hypothetical protein LPC_0082 ( <i>Legionella pneumophila</i> str. Corby)                 | 2.00E-36  |
| <i>UNLARM2_115</i>        | COG0635 | Coproporphyrinogen III oxidase and related Fe-S oxidoreductase                    | Coproporphyrinogen III oxidase ( <i>Cyanothece</i> sp. CCY0110)                           | 1.00E-41  |
| <i>UNLARM2_160</i>        | COG4191 | Signal transduction histidine kinase regulating C4-dicarboxylate transport system | Putative two-component sensor kinase ( <i>Azoarcus</i> sp. BH72)                          | 1.00E-64  |
| <i>UNLARM2_341</i>        | COG1434 | Conserved hypothetical protein                                                    | Protein of unknown function DUF218 (candidate division TM7 genomosp GTL1)                 | 2.00E-14  |
| <i>UNLARM2_359</i>        | COG3694 | ABC-type uncharacterized transport system permease component                      | Conserved hypothetical protein ( <i>Streptococcus agalactiae</i> 515)                     | 3.00E-14  |
| <i>UNLARM2_360</i>        | COG4587 | ABC-type uncharacterized transport system permease component                      | Permease component ( <i>Clostridium perfringens</i> )                                     | 6.00E-21  |
| <i>UNLARM2_361</i>        | COG4586 | ABC-type uncharacterized transport system ATBJBARM5_e component                   | ABC transporter related ( <i>Clostridium phytofermentans</i> ISDg)                        | 1.00E-56  |
| <i>UNLARM2_368</i>        | COG0722 | 3-deoxy-D-arabino-heptulosonate 7-phosphate (DAHP) synthase                       | Phospho-2-dehydro-3-deoxyheptonate aldolase ( <i>Geobacter lovleyi</i> SZ)                | 1.00E-100 |
| <i>UNLARM2_414</i>        | COG2814 | Aabinose efflux permease                                                          | Major facilitator superfamily MFS_1 ( <i>Rhodferax ferrireducens</i> T118)                | 5.00E-24  |
| <i>UNLARM2_573</i>        | COG3545 | Esterase of the $\alpha/\beta$ hydrolase fold                                     | protein of unknown function DUF1234 ( <i>Clostridium beijerinckii</i> NCIMB 8052)         | 2.00E-21  |
| <i>UNLARM2_701</i>        | COG3118 | Thioredoxin domain-containing protein                                             | Thioredoxin ( <i>Marinobacter aquaeolei</i> VT8)                                          | 7.00E-28  |
| <i>UNLARM2_876</i>        | COG0669 | Phosphopantetheine adenylyltransferase                                            | Phosphopantetheine adenylyltransferase (Pantetheine-phosphate adenylyltransferase) (PPAT) | 1.00E-42  |
| <i>Ca. P. acidiphilum</i> |         |                                                                                   |                                                                                           |           |
| ARMAN-4                   |         |                                                                                   |                                                                                           |           |
| <i>BJBARM4_72</i>         | COG2227 | 2-polyprenyl-3-methyl-5-hydroxy-6-methoxy-1-4-benzoquinol methylase               | Hypothetical protein B14911_25735 ( <i>Bacillus</i> sp. NRRL B-14911)                     | 3.00E-21  |
| <i>BJBARM4_403</i>        | COG0173 | Aspartyl-tRNA synthetase                                                          | Aspartyl-tRNA synthetase ( <i>Enterococcus faecalis</i> V583)                             | 2.00E-94  |
| <i>BJBARM4_562</i>        | COG3118 | Thioredoxin domain-containing protein                                             | TrxA protein ( <i>Mannheimia succiniciproducens</i> MBEL55E)                              | 5.00E-24  |
| <i>BJBARM4_626</i>        | COG4874 | Uncharacterized protein containing a penten-type domain                           | Hypothetical protein PBAL39_17419 ( <i>Pedobacter</i> sp. BAL39)                          | 3.00E-76  |
| <i>BJBARM4_807</i>        | COG3727 | DNA G:T-mismatch repair endonuclease                                              | DNA mismatch endonuclease Vsr ( <i>Sulfurovum</i> sp. NBC37-1)                            | 6.00E-25  |
| <i>Ca. P. acidiphilum</i> |         |                                                                                   |                                                                                           |           |
| ARMAN-5                   |         |                                                                                   |                                                                                           |           |
| <i>BJBARM5_224</i>        | COG2814 | Arabinose efflux permease                                                         | Transporter permease ( <i>Propionibacterium acnes</i> KPA171202)                          | 6.00E-51  |
| <i>BJBARM5_589</i>        | COG3118 | Thioredoxin domain-containing protein                                             | Thioredoxin ( <i>Pseudoalteromonas atlantica</i> T6c)                                     | 3.00E-24  |
| <i>BJBARM5_799</i>        | COG2227 | 2-polyprenyl-3-methyl-5-hydroxy-6-methoxy-1-4-benzoquinol methylase               | Hypothetical protein BH0355 ( <i>Bacillus halodurans</i> C-125)                           | 1.00E-22  |
| <i>BJBARM5_990</i>        | COG3118 | Thioredoxin domain-containing protein                                             | TrxA protein ( <i>Mannheimia succiniciproducens</i> MBEL55E)                              | 5.00E-24  |

**Table S2. Percentage of crenarchaeal and euryarchaeal core genes**

| Organism                          | <i>Crenarchaeota</i> : 201 core genes | <i>Euryarchaeota</i> : 52 core genes |
|-----------------------------------|---------------------------------------|--------------------------------------|
| <i>Ca. M. acidiphilum</i> ARMAN-2 | 44%                                   | 31%                                  |
| <i>Ca. P. acidiphilum</i> ARMAN-4 | 31%                                   | 25%                                  |
| <i>Ca. P. acidiphilus</i> ARMAN-5 | 33%                                   | 25%                                  |
| <i>Korarchaeota</i>               | 84%                                   | 63%                                  |
| <i>Nanoarchaeum</i>               | 36%                                   | 17%                                  |
| <i>Euryarchaeota</i>              |                                       |                                      |
| <i>Thermoplasma acidophilum</i>   | 65%                                   | 100%                                 |
| <i>Methanococcus jannaschii</i>   | 59%                                   | 100%                                 |
| <i>Crenarchaeota</i>              |                                       |                                      |
| <i>Sulfolobus tokodaii</i>        | 100%                                  | 83%                                  |
| <i>Pyrococcus abyssi</i>          | 100%                                  | 77%                                  |

Percentage of crenarchaeal and euryarchaeal core genes, as described by Elkins et al. [Elkins JG, et al. (2008) A korarchaeal genome reveals insights into the evolution of the Archaea. *Proc Natl Acad Sci USA* 105:8102–8107. in ARMAN groups that were assigned to archaeal clusters of orthologous groups and data for other Archaea.

**Table S3. List of 18 clusters of orthologous groups**

| Cluster of orthologous group | Description                                                            | ARMAN-4 | ARMAN-5 |
|------------------------------|------------------------------------------------------------------------|---------|---------|
| COG1855                      | ATBJBARM5_e (PiIT family)                                              | No      | No      |
| COG1711                      | DNA replication initiation complex subunit, GINS family                | No      | No      |
| COG1761                      | DNA-directed RNA polymerase, subunit L                                 | No      | No      |
| COG2016                      | Predicted RNA-binding protein (contains PUA domain)                    | No      | No      |
| COG2260                      | Predicted Zn-ribbon RNA-binding protein                                | No      | No      |
| COG2888                      | Predicted Zn-ribbon RNA-binding protein with a function in translation | No      | No      |
| COG0130                      | Pseudouridine synthase                                                 | Present | Present |
| COG0255                      | Ribosomal protein L29                                                  | No      | No      |
| COG2097                      | Ribosomal protein L31E                                                 | Present | Present |
| COG1631                      | Ribosomal protein L44E                                                 | Present | Present |
| COG1383                      | Ribosomal protein S17E                                                 | No      | No      |
| COG2051                      | Ribosomal protein S27E                                                 | Present | Present |
| COG1718                      | Serine/threonine protein kinase involved in cell cycle control         | Present | No      |
| COG0681                      | Signal peptidase I                                                     | No      | No      |
| COG0195                      | Transcription elongation factor                                        | Present | No      |
| COG2092                      | Translation elongation factor EF-1beta                                 | No      | No      |

List of 18 clusters of orthologous groups that are present in all 34 archaeal genomes used to make the archaeal clusters of orthologous groups database, but missing in ARMAN-2. Columns to the right indicate whether these genes are present or absent in ARMAN Groups 4 and 5.

**Table S4. Summary of all identified *Ca. M. acidiphilum* ARMAN-2 proteins from all proteomic datasets, along with total spectral counts (as sorted by predicted functional classes)**

| Protein     | Description                                                                              | Total sum | No. of biofilms | Average spectra | Function                            |
|-------------|------------------------------------------------------------------------------------------|-----------|-----------------|-----------------|-------------------------------------|
| UNLARM2_969 | Branched-chain amino acid aminotransferase                                               | 5         | 1               | 5.0             | Amino acid metabolism               |
| UNLARM2_682 | Glu/Leu/Phe/Val dehydrogenase                                                            | 108       | 4               | 27.0            | Amino acid metabolism               |
| UNLARM2_350 | Histidine ammonia-lyase                                                                  | 36        | 3               | 12.0            | Amino acid metabolism               |
| UNLARM2_722 | Aspartate/glutamate/uridylate kinase                                                     | 20        | 1               | 20.0            | Amino acid metabolism               |
| UNLARM2_750 | Aldehyde Dehydrogenase_                                                                  | 10        | 3               | 3.3             | Amino acid metabolism               |
| UNLARM2_658 | Ornithine carbamoyltransferase                                                           | 7         | 2               | 3.5             | Amino acid metabolism               |
| UNLARM2_992 | Arginyl-tRNA synthetase                                                                  | 6         | 1               | 6.0             | Amino acid metabolism               |
| UNLARM2_104 | Asparaginy-tRNA synthetase                                                               | 6         | 2               | 3.0             | Amino acid metabolism               |
| UNLARM2_78  | Isoleucyl-tRNA synthetase                                                                | 5         | 2               | 2.5             | Amino acid metabolism               |
| UNLARM2_403 | Aldehyde Dehydrogenase_                                                                  | 4         | 1               | 4.0             | Amino acid metabolism               |
| UNLARM2_908 | Cysteinyl-tRNA synthetase                                                                | 4         | 2               | 2.0             | Amino acid metabolism               |
| UNLARM2_183 | Valyl-tRNA synthetase                                                                    | 4         | 2               | 2.0             | Amino acid metabolism               |
| UNLARM2_351 | Acetylnornithine deacetylase or succinyl-diaminopimelate desuccinylase                   | 2         | 1               | 2.0             | Amino acid metabolism               |
| UNLARM2_961 | Aminotransferase class I and II                                                          | 2         | 1               | 2.0             | Amino acid metabolism               |
| UNLARM2_155 | Aminotransferase class V                                                                 | 2         | 1               | 2.0             | Amino acid metabolism               |
| UNLARM2_717 | Aminotransferase class-III                                                               | 2         | 1               | 2.0             | Amino acid metabolism               |
| UNLARM2_869 | Chorismate mutase                                                                        | 2         | 1               | 2.0             | Amino acid metabolism               |
| UNLARM2_878 | Glycine hydroxymethyltransferase                                                         | 2         | 1               | 2.0             | Amino acid metabolism               |
| UNLARM2_489 | Seryl-tRNA synthetase                                                                    | 2         | 1               | 2.0             | Amino acid metabolism               |
| UNLARM2_226 | Threonyl-tRNA synthetase                                                                 | 2         | 1               | 2.0             | Amino acid metabolism               |
| UNLARM2_735 | SMC domain protein                                                                       | 24        | 7               | 3.4             | Cell division/Replication           |
| UNLARM2_213 | Cell division/Replication protein FtsZ                                                   | 7         | 2               | 3.5             | Cell division/Replication           |
| UNLARM2_644 | Inorganic diphosphatase                                                                  | 7         | 2               | 3.5             | Cell division/Replication           |
| UNLARM2_522 | DNA ligase I, ATP-dependent Dnl1                                                         | 4         | 2               | 2.0             | Cell division/Replication           |
| UNLARM2_189 | DNA topoisomerase I                                                                      | 4         | 2               | 2.0             | Cell division/Replication           |
| UNLARM2_674 | SMC domain protein                                                                       | 3         | 1               | 3.0             | Cell division/Replication           |
| UNLARM2_895 | ATJBARM5_e involved in chromosome partitioning-like                                      | 2         | 1               | 2.0             | Cell division/Replication           |
| UNLARM2_325 | Mandelate racemase/muconate lactonizing protein                                          | 86        | 2               | 43.0            | Cell wall/Membrane/Lipid biogenesis |
| UNLARM2_148 | Oxidoreductase FAD/NAD(P)-binding domain protein                                         | 6         | 2               | 3.0             | Cell wall/Membrane/Lipid biogenesis |
| UNLARM2_421 | Geranylgeranyl glyceryl phosphate synthase                                               | 6         | 3               | 2.0             | Cell wall/Membrane/Lipid biogenesis |
| UNLARM2_418 | Glycosyl transferase family 2                                                            | 5         | 2               | 2.5             | Cell wall/Membrane/Lipid biogenesis |
| UNLARM2_714 | Glycosyl transferase group 1                                                             | 2         | 1               | 2.0             | Cell wall/Membrane/Lipid biogenesis |
| UNLARM2_776 | Glycosyl transferase group 1                                                             | 2         | 1               | 2.0             | Cell wall/Membrane/Lipid biogenesis |
| UNLARM2_739 | Geranylgeranyl reductase                                                                 | 2         | 1               | 2.0             | Cell wall/Membrane/Lipid biogenesis |
| UNLARM2_039 | 3-hydroxy-3-methylglutaryl CoA synthase-like                                             | 8         | 2               | 4.0             | Cell wall/Membrane/Lipid biogenesis |
| UNLARM2_544 | 3-hydroxybutyryl-CoA dehydrogenase                                                       | 5         | 1               | 5.0             | Cell wall/Membrane/Lipid biogenesis |
| UNLARM2_386 | Diphosphomevalonate decarboxylase                                                        | 2         | 1               | 2.0             | Cell wall/Membrane/Lipid biogenesis |
| UNLARM2_204 | H <sup>+</sup> -transporting two-sector ATJBARM5_e $\alpha/\beta$ subunit central region | 165       | 8               | 20.6            | Energy production                   |
| UNLARM2_838 | NADP oxidoreductase coenzyme F420-dependent                                              | 130       | 5               | 26.0            | Energy production                   |
| UNLARM2_203 | H <sup>+</sup> -transporting two-sector ATJBARM5_e $\alpha/\beta$ subunit central region | 111       | 8               | 13.9            | Energy production                   |
| UNLARM2_769 | Pyruvate flavodoxin/ferredoxin oxidoreductase domain protein                             | 39        | 4               | 9.8             | Energy production                   |
| UNLARM2_762 | Aconitate hydratase 1                                                                    | 27        | 6               | 4.5             | Energy production                   |
| UNLARM2_564 | Succinate dehydrogenase or fumarate reductase, flavoprotein subunit                      | 12        | 2               | 6.0             | Energy production                   |



Table S4. Cont.

| Protein     | Description                                                                 | Total sum | No. of biofilms | Average spectra | Function          |
|-------------|-----------------------------------------------------------------------------|-----------|-----------------|-----------------|-------------------|
| UNLARM2_559 | Malate dehydrogenase (oxaloacetate-decarboxylating) [NADP(+)]               | 11        | 3               | 3.7             | Energy production |
| UNLARM2_768 | Pyruvate ferredoxin/ferredoxin oxidoreductase, $\beta$ subunit              | 5         | 1               | 5.0             | Energy production |
| UNLARM2_561 | Succinate dehydrogenase and fumarate reductase iron-sulfur protein          | 4         | 2               | 2.0             | Energy production |
| UNLARM2_143 | Pyruvate dehydrogenase (acetyl-transferring) E1 component, $\alpha$ subunit | 3         | 1               | 3.0             | Energy production |
| UNLARM2_146 | Dihydropyrimidinase                                                         | 3         | 1               | 3.0             | Energy production |
| UNLARM2_852 | Aldo/keto reductase                                                         | 2         | 1               | 2.0             | Energy production |
| UNLARM2_493 | Hypothetical protein                                                        | 480       | 5               | 96.0            | Function unknown  |
| UNLARM2_752 | Hypothetical protein                                                        | 97        | 4               | 24.3            | Function unknown  |
| UNLARM2_592 | Hypothetical protein                                                        | 87        | 2               | 43.5            | Function unknown  |
| UNLARM2_689 | Hypothetical protein                                                        | 80        | 3               | 26.7            | Function unknown  |
| UNLARM2_594 | Hypothetical protein                                                        | 56        | 2               | 28.0            | Function unknown  |
| UNLARM2_425 | Hypothetical protein                                                        | 52        | 4               | 13.0            | Function unknown  |
| UNLARM2_700 | Hypothetical protein                                                        | 51        | 4               | 12.8            | Function unknown  |
| UNLARM2_918 | Conserved hypothetical protein                                              | 45        | 5               | 9.0             | Function unknown  |
| UNLARM2_558 | Hypothetical protein                                                        | 41        | 2               | 20.5            | Function unknown  |
| UNLARM2_521 | Hypothetical protein                                                        | 36        | 4               | 9.0             | Function unknown  |
| UNLARM2_118 | Hypothetical protein                                                        | 31        | 4               | 7.8             | Function unknown  |
| UNLARM2_695 | 3' exoribonuclease                                                          | 21        | 4               | 5.3             | Function unknown  |
| UNLARM2_291 | Hypothetical protein                                                        | 15        | 4               | 3.8             | Function unknown  |
| UNLARM2_778 | Nucleic acid binding OB-fold tRNA/helicase-type                             | 15        | 4               | 3.8             | Function unknown  |
| UNLARM2_308 | Protein of unknown function DUF124                                          | 14        | 3               | 4.7             | Function unknown  |
| UNLARM2_151 | Putative circadian clock protein, KaiC                                      | 13        | 1               | 13.0            | Function unknown  |
| UNLARM2_978 | RNA-binding S4 domain protein                                               | 11        | 1               | 11.0            | Function unknown  |
| UNLARM2_261 | Hypothetical protein                                                        | 8         | 1               | 8.0             | Function unknown  |
| UNLARM2_830 | Protein of unknown function DUF124                                          | 8         | 2               | 4.0             | Function unknown  |
| UNLARM2_367 | Band 7 protein                                                              | 8         | 1               | 8.0             | Function unknown  |
| UNLARM2_024 | Hypothetical protein                                                        | 7         | 1               | 7.0             | Function unknown  |
| UNLARM2_93  | Hypothetical protein                                                        | 7         | 3               | 2.3             | Function unknown  |
| UNLARM2_696 | 3' exoribonuclease                                                          | 7         | 1               | 7.0             | Function unknown  |
| UNLARM2_161 | Conserved hypothetical protein                                              | 6         | 3               | 2.0             | Function unknown  |
| UNLARM2_127 | TOPRIM domain protein                                                       | 6         | 3               | 2.0             | Function unknown  |
| UNLARM2_241 | Hypothetical protein                                                        | 5         | 1               | 5.0             | Function unknown  |
| UNLARM2_020 | Hypothetical protein                                                        | 4         | 1               | 4.0             | Function unknown  |
| UNLARM2_280 | Hypothetical protein                                                        | 4         | 1               | 4.0             | Function unknown  |
| UNLARM2_586 | Hypothetical protein                                                        | 4         | 2               | 2.0             | Function unknown  |
| UNLARM2_720 | Hypothetical protein                                                        | 4         | 2               | 2.0             | Function unknown  |
| UNLARM2_219 | Protein of unknown function DUF1621                                         | 4         | 1               | 4.0             | Function unknown  |
| UNLARM2_169 | Protein of unknown function DUF87                                           | 4         | 2               | 2.0             | Function unknown  |
| UNLARM2_446 | dTMP kinase                                                                 | 4         | 2               | 2.0             | Function unknown  |
| UNLARM2_610 | Nonspecific serine/threonine protein kinase                                 | 4         | 1               | 4.0             | Function unknown  |
| UNLARM2_073 | Conserved hypothetical protein                                              | 3         | 1               | 3.0             | Function unknown  |
| UNLARM2_962 | Conserved hypothetical protein                                              | 3         | 1               | 3.0             | Function unknown  |
| UNLARM2_429 | Protein of unknown function Met10                                           | 3         | 1               | 3.0             | Function unknown  |
| UNLARM2_987 | DEAD/H associated domain protein                                            | 3         | 1               | 3.0             | Function unknown  |
| UNLARM2_836 | Proliferating cell nuclear antigen PcnA                                     | 3         | 1               | 3.0             | Function unknown  |
| UNLARM2_352 | Rossmann fold nucleotide-binding protein                                    | 3         | 1               | 3.0             | Function unknown  |
| UNLARM2_43  | HAD-superfamily hydrolase, subfamily IIB                                    | 2         | 1               | 2.0             | Function unknown  |
| UNLARM2_718 | CoA-binding domain protein                                                  | 2         | 1               | 2.0             | Function unknown  |
| UNLARM2_019 | Hypothetical protein                                                        | 2         | 1               | 2.0             | Function unknown  |
| UNLARM2_58  | Hypothetical protein                                                        | 2         | 1               | 2.0             | Function unknown  |
| UNLARM2_126 | Hypothetical protein                                                        | 2         | 1               | 2.0             | Function unknown  |
| UNLARM2_150 | Hypothetical protein                                                        | 2         | 1               | 2.0             | Function unknown  |
| UNLARM2_84  | Hypothetical protein                                                        | 2         | 1               | 2.0             | Function unknown  |
| UNLARM2_167 | Hypothetical protein                                                        | 2         | 1               | 2.0             | Function unknown  |
| UNLARM2_230 | Hypothetical protein                                                        | 2         | 1               | 2.0             | Function unknown  |
| UNLARM2_310 | Hypothetical protein                                                        | 2         | 1               | 2.0             | Function unknown  |

Table S4. Cont.

| Protein      | Description                                                             | Total sum | No. of biofilms | Average spectra | Function                                      |
|--------------|-------------------------------------------------------------------------|-----------|-----------------|-----------------|-----------------------------------------------|
| UNLARM2_355  | Hypothetical protein                                                    | 2         | 1               | 2.0             | Function unknown                              |
| UNLARM2_448  | Hypothetical protein                                                    | 2         | 1               | 2.0             | Function unknown                              |
| UNLARM2_464  | Hypothetical protein                                                    | 2         | 1               | 2.0             | Function unknown                              |
| UNLARM2_341  | Protein of unknown function DUF218                                      | 2         | 1               | 2.0             | Function unknown                              |
| UNLARM2_973  | Protein of unknown function DUF373                                      | 2         | 1               | 2.0             | Function unknown                              |
| UNLARM2_194  | Protein of unknown function DUF655                                      | 2         | 1               | 2.0             | Function unknown                              |
| UNLARM2_366  | Chlorite dismutase                                                      | 2         | 1               | 2.0             | Function unknown                              |
| UNLARM2_795  | DEAD/DEAH box helicase domain protein                                   | 2         | 1               | 2.0             | Function unknown                              |
| UNLARM2_715  | TATA-box binding family protein                                         | 2         | 1               | 2.0             | Function unknown                              |
| UNLARM2_406  | Dihydroxy-acid dehydratase                                              | 24        | 3               | 8.0             | General metabolism                            |
| UNLARM2_725  | Deoxyhypusine synthase                                                  | 9         | 2               | 4.5             | General metabolism                            |
| UNLARM2_555  | Carboxymethylenebutenolidase                                            | 4         | 1               | 4.0             | General metabolism                            |
| UNLARM2_654  | GTP cyclohydrolase II                                                   | 2         | 1               | 2.0             | General metabolism                            |
| UNLARM2_842  | Nicotinamide phosphoribosyltransferase                                  | 2         | 1               | 2.0             | General metabolism                            |
| UNLARM2_279  | ATP-cobalamin adenosyltransferase                                       | 2         | 1               | 2.0             | General metabolism                            |
| UNLARM2_465  | Thymidylate kinase                                                      | 43        | 4               | 10.8            | Nucleotide metabolism                         |
| UNLARM2_297  | Ribonucleoside-diphosphate reductase, adenosylcobalamin-dependent       | 32        | 4               | 8.0             | Nucleotide metabolism                         |
| UNLARM2_585  | Nucleoside-diphosphate kinase                                           | 2         | 1               | 2.0             | Nucleotide metabolism                         |
| UNLARM2_780  | Thermosome                                                              | 204       | 5               | 40.8            | PTMs, protein folding and turnover            |
| UNLARM2_459  | Heat shock protein Hsp20                                                | 45        | 4               | 11.3            | PTMs, protein folding and turnover            |
| UNLARM2_453  | Proteasome endopeptidase complex                                        | 44        | 5               | 8.8             | PTMs, protein folding and turnover            |
| UNLARM2_456  | Chaperone protein DnaK                                                  | 39        | 5               | 7.8             | PTMs, protein folding and turnover            |
| UNLARM2_701  | Thioredoxin                                                             | 31        | 4               | 7.8             | PTMs, protein folding and turnover            |
| UNLARM2_692  | Proteasome endopeptidase complex                                        | 27        | 2               | 13.5            | PTMs, protein folding and turnover            |
| UNLARM2_177  | Radical SAM domain protein                                              | 26        | 6               | 4.3             | PTMs, protein folding and turnover            |
| UNLARM2_120  | AAA family ATJBARM5_e, CDC48 subfamily                                  | 16        | 4               | 4.0             | PTMs, protein folding and turnover            |
| UNLARM2_736  | Peptidase M50                                                           | 11        | 1               | 11.0            | PTMs, protein folding and turnover            |
| UNLARM2_301  | Peptidase S16, Lon-like protease                                        | 10        | 1               | 10.0            | PTMs, protein folding and turnover            |
| UNLARM2_47   | Peptidase M1 membrane alanine aminopeptidase                            | 9         | 2               | 4.5             | PTMs, protein folding and turnover            |
| UNLARM2_455  | Chaperone protein DnaJ                                                  | 8         | 3               | 2.7             | PTMs, protein folding and turnover            |
| UNLARM2_858  | Peptidase U61 LD-carboxypeptidase A                                     | 4         | 1               | 4.0             | PTMs, protein folding and turnover            |
| UNLARM2_591  | ATJBARM5_e, AAA+ superfamily                                            | 3         | 1               | 3.0             | PTMs, protein folding and turnover            |
| UNLARM2_1005 | Radical SAM domain protein                                              | 2         | 1               | 2.0             | PTMs, protein folding and turnover            |
| UNLARM2_886  | AAA ATJBARM5_e                                                          | 2         | 1               | 2.0             | PTMs, protein folding and turnover            |
| UNLARM2_246  | AAA ATJBARM5_e central domain protein                                   | 2         | 1               | 2.0             | PTMs, protein folding and turnover            |
| UNLARM2_964  | AAA ATJBARM5_e central domain protein                                   | 2         | 1               | 2.0             | PTMs, protein folding and turnover            |
| UNLARM2_684  | Alkyl hydroperoxide reductase/ Thiol specific antioxidant/ Mal allergen | 2         | 1               | 2.0             | PTMs, protein folding and turnover            |
| UNLARM2_224  | Putative signal transduction protein with CBS domains                   | 26        | 3               | 8.7             | Signal transduction/Intracellular trafficking |
| UNLARM2_917  | Type II secretion system protein E                                      | 11        | 3               | 3.7             | Signal transduction/Intracellular trafficking |
| UNLARM2_915  | Signal recognition particle-docking protein FtsY                        | 7         | 2               | 3.5             | Signal transduction/Intracellular trafficking |

Table S4. Cont.

| Protein     | Description                                                                            | Total sum | No. of biofilms | Average spectra | Function                                      |
|-------------|----------------------------------------------------------------------------------------|-----------|-----------------|-----------------|-----------------------------------------------|
| UNLARM2_94  | Type II secretion system protein E                                                     | 7         | 1               | 7.0             | Signal transduction/Intracellular trafficking |
| UNLARM2_160 | Signal transduction histidine kinase regulating C4-dicarboxylate transport system-like | 2         | 1               | 2.0             | Signal transduction/Intracellular trafficking |
| UNLARM2_471 | RNA polymerase Rpb2 domain 6                                                           | 34        | 7               | 4.9             | Transcription                                 |
| UNLARM2_472 | RNA polymerase $\beta$ subunit                                                         | 33        | 4               | 8.3             | Transcription                                 |
| UNLARM2_450 | Transcription factor TFIIB cyclin-related                                              | 23        | 5               | 4.6             | Transcription                                 |
| UNLARM2_470 | RNA polymerase $\alpha$ subunit                                                        | 22        | 4               | 5.5             | Transcription                                 |
| UNLARM2_473 | RNA polymerase Rpb5                                                                    | 12        | 1               | 12.0            | Transcription                                 |
| UNLARM2_469 | RNA polymerase Rpb1 domain 5                                                           | 4         | 2               | 2.0             | Transcription                                 |
| UNLARM2_616 | DNA-directed RNA polymerase                                                            | 2         | 1               | 2.0             | Transcription                                 |
| UNLARM2_926 | RNA polymerase insert                                                                  | 2         | 1               | 2.0             | Transcription                                 |
| UNLARM2_196 | RNA polymerase Rpb4                                                                    | 2         | 1               | 2.0             | Transcription                                 |
| UNLARM2_250 | Translation elongation factor EF-1, subunit $\alpha$                                   | 194       | 5               | 38.8            | Translation                                   |
| UNLARM2_837 | DNase/rho motif-related TRAM                                                           | 28        | 2               | 14.0            | Translation                                   |
| UNLARM2_637 | Ribosomal protein 60S                                                                  | 27        | 4               | 6.8             | Translation                                   |
| UNLARM2_921 | Ribosomal protein S2                                                                   | 27        | 3               | 9.0             | Translation                                   |
| UNLARM2_730 | Translation elongation factor aEF-2                                                    | 16        | 4               | 4.0             | Translation                                   |
| UNLARM2_731 | Ribosomal protein S7                                                                   | 11        | 1               | 11.0            | Translation                                   |
| UNLARM2_636 | Ribosomal protein L10                                                                  | 8         | 3               | 2.7             | Translation                                   |
| UNLARM2_985 | Ribosomal protein S5                                                                   | 8         | 2               | 4.0             | Translation                                   |
| UNLARM2_820 | Ribosomal protein L3                                                                   | 5         | 2               | 2.5             | Translation                                   |
| UNLARM2_729 | Ribosomal protein L7Ae/L30e/S12e/Gadd45                                                | 5         | 1               | 5.0             | Translation                                   |
| UNLARM2_660 | 30S ribosomal protein S8e                                                              | 4         | 2               | 2.0             | Translation                                   |
| UNLARM2_427 | Ribosomal protein L11                                                                  | 4         | 2               | 2.0             | Translation                                   |
| UNLARM2_652 | Ribosomal protein S13                                                                  | 4         | 2               | 2.0             | Translation                                   |
| UNLARM2_651 | Ribosomal protein S4                                                                   | 4         | 2               | 2.0             | Translation                                   |
| UNLARM2_121 | Ribosomal protein S6e                                                                  | 4         | 2               | 2.0             | Translation                                   |
| UNLARM2_686 | S1 IF1 family protein                                                                  | 4         | 1               | 4.0             | Translation                                   |
| UNLARM2_924 | Ribosomal protein L13                                                                  | 3         | 1               | 3.0             | Translation                                   |
| UNLARM2_819 | Ribosomal protein L4/L1e                                                               | 3         | 1               | 3.0             | Translation                                   |
| UNLARM2_814 | Ribosomal protein S3- domain protein                                                   | 3         | 1               | 3.0             | Translation                                   |
| UNLARM2_76  | Nucleotidyl transferase                                                                | 2         | 1               | 2.0             | Translation                                   |
| UNLARM2_678 | Ribosomal protein L16                                                                  | 2         | 1               | 2.0             | Translation                                   |
| UNLARM2_923 | Ribosomal protein S9                                                                   | 2         | 1               | 2.0             | Translation                                   |
| UNLARM2_216 | SSU ribosomal protein S24E                                                             | 2         | 1               | 2.0             | Translation                                   |

One hundred seventy-three ARMAN-2 proteins (~15% of the genome) were detected across all searched proteomes. PTM, posttranslational modification; SMC, structural maintenance of chromosomes.

**Table S5. Summary of all identified *Ca. P. acidiphilum* ARMAN-4 proteins from all proteomic datasets, along with total spectral counts (as sorted by predicted functional classes)**

| Protein      | Description                                                                               | Total sum | No. of biofilms | Average spectra | Function                            |
|--------------|-------------------------------------------------------------------------------------------|-----------|-----------------|-----------------|-------------------------------------|
| BJBARM4_984  | Glycine hydroxymethyltransferase                                                          | 6         | 2               | 3.0             | Amino acid metabolism               |
| BJBARM4_953  | Alanine-tRNA ligase                                                                       | 2         | 1               | 2.0             | Amino acid metabolism               |
| BJBARM4_182  | Phosphoadenosine phosphosulfate reductase                                                 | 2         | 1               | 2.0             | Amino acid metabolism               |
| BJBARM4_946  | DNA topoisomerase type IA central domain protein                                          | 2         | 1               | 2.0             | Cell division/Replication           |
| BJBARM4_758  | Mandelate racemase/muconate lactonizing protein                                           | 2         | 1               | 2.0             | Cell wall/Membrane/Lipid biogenesis |
| BJBARM4_086  | H <sup>+</sup> -transporting two-sector ATBJBARM5_e $\alpha/\beta$ subunit central region | 79        | 4               | 19.8            | Energy production                   |
| BJBARM4_570  | Succinate dehydrogenase                                                                   | 33        | 3               | 11.0            | Energy production                   |
| BJBARM4_902  | Aldo/keto reductase                                                                       | 14        | 2               | 7.0             | Energy production                   |
| BJBARM4_536  | Aconitate hydratase 1                                                                     | 8         | 3               | 2.7             | Energy production                   |
| BJBARM4_283  | Fumarate lyase                                                                            | 4         | 1               | 4.0             | Energy production                   |
| BJBARM4_495  | Phosphoenolpyruvate synthase                                                              | 4         | 2               | 2.0             | Energy production                   |
| BJBARM4_761  | Aldehyde Dehydrogenase                                                                    | 3         | 1               | 3.0             | Energy production                   |
| BJBARM4_746  | Succinate-CoA ligase (ADP-forming)                                                        | 2         | 1               | 2.0             | Energy production                   |
| BJBARM4_1007 | Undefined product                                                                         | 21        | 3               | 7.0             | Function unknown                    |
| BJBARM4_895  | NADPH-dependent FMN reductase                                                             | 6         | 1               | 6.0             | Function unknown                    |
| BJBARM4_163  | Hypothetical protein                                                                      | 4         | 2               | 2.0             | Function unknown                    |
| BJBARM4_417  | Hypothetical protein                                                                      | 4         | 2               | 2.0             | Function unknown                    |
| BJBARM4_399  | Hypothetical protein                                                                      | 3         | 1               | 3.0             | Function unknown                    |
| BJBARM4_776  | Hypothetical protein                                                                      | 3         | 1               | 3.0             | Function unknown                    |
| BJBARM4_921  | Cell Division/Replication factor C                                                        | 3         | 1               | 3.0             | Function unknown                    |
| BJBARM4_046  | Hypothetical protein                                                                      | 2         | 1               | 2.0             | Function unknown                    |
| BJBARM4_730  | Hypothetical protein                                                                      | 2         | 1               | 2.0             | Function unknown                    |
| BJBARM4_919  | Hypothetical protein                                                                      | 2         | 1               | 2.0             | Function unknown                    |
| BJBARM4_754  | Shwachman-Bodian-Diamond syndrome protein                                                 | 2         | 1               | 2.0             | Function unknown                    |
| BJBARM4_452  | Plasma-membrane proton-efflux P-type ATBJBARM5_e                                          | 2         | 1               | 2.0             | General metabolism                  |
| BJBARM4_510  | Histidine triad (HIT) protein                                                             | 2         | 1               | 2.0             | General metabolism                  |
| BJBARM4_025  | Chaperone protein DnaK                                                                    | 15        | 2               | 7.5             | PTMs, protein folding and turnover  |
| BJBARM4_093  | Microtubule-severing ATBJBARM5_e                                                          | 13        | 3               | 4.3             | PTMs, protein folding and turnover  |
| BJBARM4_177  | Thermosome                                                                                | 6         | 2               | 3.0             | PTMs, protein folding and turnover  |
| BJBARM4_343  | Nucleotidyl transferase                                                                   | 2         | 1               | 2.0             | Translation                         |
| BJBARM4_767  | Ribosomal protein L3                                                                      | 2         | 1               | 2.0             | Translation                         |
| BJBARM4_947  | Translation elongation factor EF-1, subunit- $\alpha$                                     | 2         | 1               | 2.0             | Translation                         |

Thirty-two ARMAN-4 proteins were detected across all searched proteomes.

**Table S6. Summary of all identified *Ca. P. acidophilus* ARMAN-5 proteins from all proteomic datasets, along with total spectral counts (as sorted by predicted functional classes)**

| Protein      | Description                                                                               | Total sum | No. of biofilms | Average spectra | Function                                      |
|--------------|-------------------------------------------------------------------------------------------|-----------|-----------------|-----------------|-----------------------------------------------|
| BJBARM5_475  | Zinc-binding alcohol dehydrogenase family protein                                         | 4         | 1               | 4.0             | Amino acid metabolism                         |
| BJBARM5_756  | Histone acetyltransferase, ELP3 family                                                    | 8         | 2               | 4.0             | Cell division/Replication                     |
| BJBARM5_827  | DNA topoisomerase VI subunit B                                                            | 2         | 1               | 2.0             | Cell division/Replication                     |
| BJBARM5_656  | H <sup>+</sup> -transporting two-sector ATBJBARM5_e $\alpha/\beta$ subunit central region | 80        | 4               | 20.0            | Energy production                             |
| BJBARM5_821  | H <sup>+</sup> -transporting two-sector ATBJBARM5_e $\alpha/\beta$ subunit central region | 78        | 4               | 19.5            | Energy production                             |
| BJBARM5_597  | Succinate dehydrogenase                                                                   | 39        | 3               | 13.0            | Energy production                             |
| BJBARM5_951  | H <sup>+</sup> -transporting two-sector ATBJBARM5_e $\alpha/\beta$ subunit domain protein | 30        | 3               | 10.0            | Energy production                             |
| BJBARM5_415  | Mercuric reductase                                                                        | 10        | 2               | 5.0             | Energy production                             |
| BJBARM5_510  | Aconitate hydratase 1                                                                     | 9         | 3               | 3.0             | Energy production                             |
| BJBARM5_1022 | Aconitate hydratase 1                                                                     | 9         | 3               | 3.0             | Energy production                             |
| BJBARM5_160  | Hypothetical protein                                                                      | 33        | 2               | 16.5            | Function unknown                              |
| BJBARM5_1073 | Hypothetical protein                                                                      | 33        | 2               | 16.5            | Function unknown                              |
| BJBARM5_1106 | Signal recognition particle receptor                                                      | 7         | 2               | 3.5             | Function unknown                              |
| BJBARM5_081  | Hypothetical protein                                                                      | 4         | 2               | 2.0             | Function unknown                              |
| BJBARM5_432  | Hypothetical protein                                                                      | 4         | 2               | 2.0             | Function unknown                              |
| BJBARM5_929  | Hypothetical protein                                                                      | 4         | 2               | 2.0             | Function unknown                              |
| BJBARM5_859  | Hypothetical protein                                                                      | 3         | 1               | 3.0             | Function unknown                              |
| BJBARM5_022  | Hypothetical protein                                                                      | 2         | 1               | 2.0             | Function unknown                              |
| BJBARM5_230  | Hypothetical protein                                                                      | 2         | 1               | 2.0             | Function unknown                              |
| BJBARM5_627  | Hypothetical protein                                                                      | 2         | 1               | 2.0             | Function unknown                              |
| BJBARM5_715  | Hypothetical protein                                                                      | 2         | 1               | 2.0             | Function unknown                              |
| BJBARM5_831  | RNA-binding protein-like                                                                  | 2         | 1               | 2.0             | Function unknown                              |
| BJBARM5_857  | Chaperone protein DnaK                                                                    | 17        | 2               | 8.5             | PTMs, protein folding and turnover            |
| BJBARM5_694  | RecA-superfamily ATBJBARM5_e implicated in signal transduction-like                       | 2         | 1               | 2.0             | Signal transduction/Intracellular trafficking |
| BJBARM5_877  | RecA-superfamily ATBJBARM5_e implicated in signal transduction-like                       | 2         | 1               | 2.0             | Signal transduction/Intracellular trafficking |
| BJBARM5_1004 | Ribosomal protein L32e                                                                    | 2         | 1               | 2.0             | Translation                                   |
| BJBARM5_089  | Diphthine synthase                                                                        | 2         | 1               | 2.0             | Translation                                   |

Twenty-seven ARMAN-5 proteins were detected across all searched proteomes.

**Table S7. Number of proteins, peptides, and spectral counts attributable to ARMAN proteins across the biofilms**

| Sample type                        | Total spectra | ARMAN spectra | ARMAN spectra | Total peptides | ARMAN peptides | ARMAN peptides |
|------------------------------------|---------------|---------------|---------------|----------------|----------------|----------------|
| ABend*                             | 517,348       | 63            | 0.01%         | 190,600        | 40             | 0.02%          |
| ABfront M2 lysis*                  | 398,886       | 77            | 0.02%         | 166,738        | 44             | 0.03%          |
| ABfront S lysis*                   | 161,137       | 82            | 0.05%         | 82,139         | 61             | 0.07%          |
| UBAultraback M2 lysis <sup>†</sup> | 369,475       | 319           | 0.09%         | 178,519        | 277            | 0.16%          |
| UBAultraback S lysis <sup>†</sup>  | 119,299       | 169           | 0.14%         | 48,891         | 156            | 0.32%          |
| ABmuck*                            | 396,544       | 97            | 0.02%         | 166,493        | 64             | 0.04%          |
| ABmuck Friable*                    | 475,026       | 128           | 0.03%         | 206,557        | 83             | 0.04%          |
| UBA-BS M2 lysis <sup>†</sup>       | 205,596       | 944           | <b>0.46%</b>  | 99,179         | 668            | <b>0.67%</b>   |
| UBA-BS S lysis <sup>†</sup>        | 113,991       | 1505          | <b>1.32%</b>  | 56,242         | 1008           | <b>1.79%</b>   |
| UBA-BS2 <sup>†</sup>               | 206,023       | 642           | 0.31%         | 106,376        | 544            | 0.51%          |

Note the highest abundance of ARMAN proteins in biofilms from the UBA BS location (in boldface). The S lysis buffer yielded higher percentages of ARMAN identifications than the M2 buffer (*Materials and Methods*).

\*AMD\_CoreDB\_04232008, the core acid mine drainage database containing ARMAN-2 but not -4 or -5.

<sup>†</sup>amdv1allfrm\_arman\_AMD\_CoreDB\_04232008, supplemented with ARMAN-4 and -5.

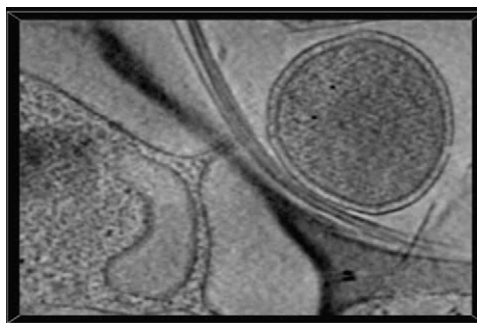

**Movie S1.** Three-dimensional transmission cryo-electron microscopy reconstruction of ARMAN-*Thermoplasma* interaction. This is the same field of view shown in Fig. 4. The cell on the left is the archaeon from the order *Thermoplasmales* and the one on the right is an ARMAN.

[Movie S1](#)

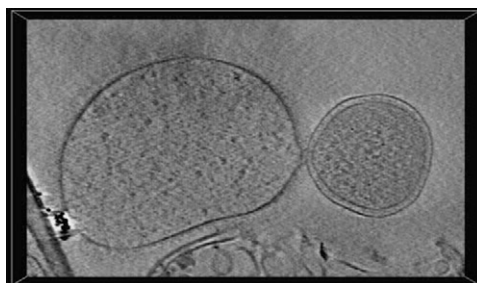

**Movie S2.** Three-dimensional transmission cryo-electron microscopy reconstruction of ARMAN-*Thermoplasmales* interaction. The cell on the left is the archaeon from the order *Thermoplasmales* and the one on the right is an ARMAN.

[Movie S2](#)

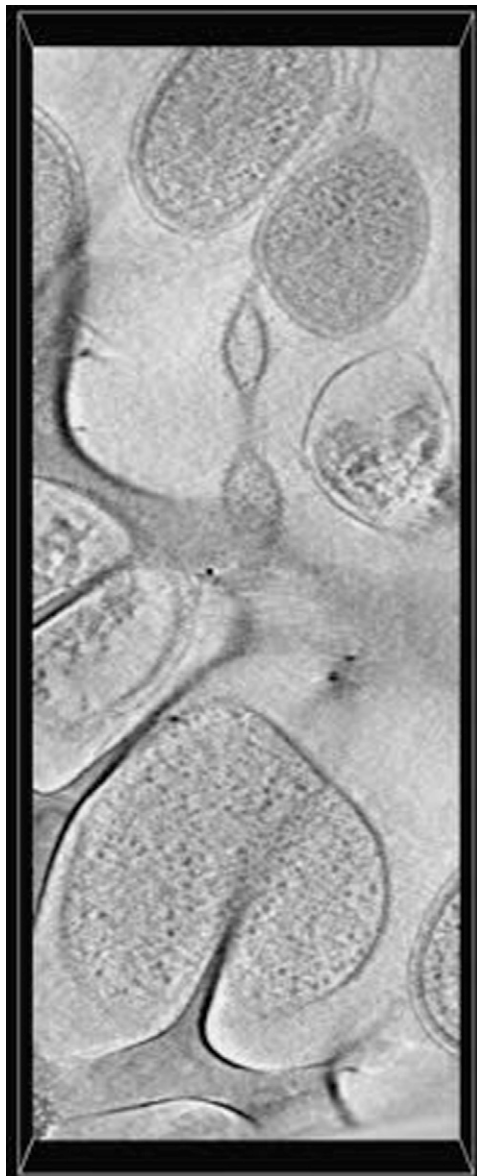

**Movie S3.** Three-dimensional transmission cryo-electron microscopy reconstruction of ARMAN-*Thermoplasmatales* interaction. The cell on the bottom is the archaeon from the order *Thermoplasmatales* and the one on the top is an ARMAN.

[Movie S3](#)
